# Supplementary material
Source: Springer Nature journal article supplement (https://www.springermedizin.de/resource/supplementary/13058_2012_3200_MOESM3_ESM.pdf/9703476)

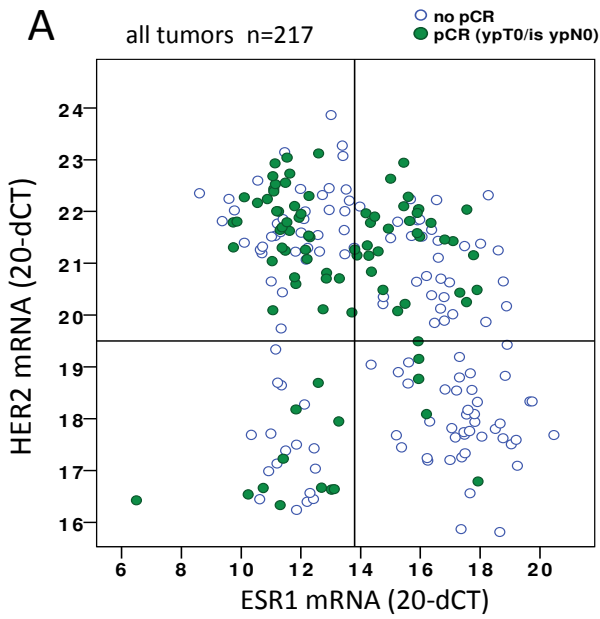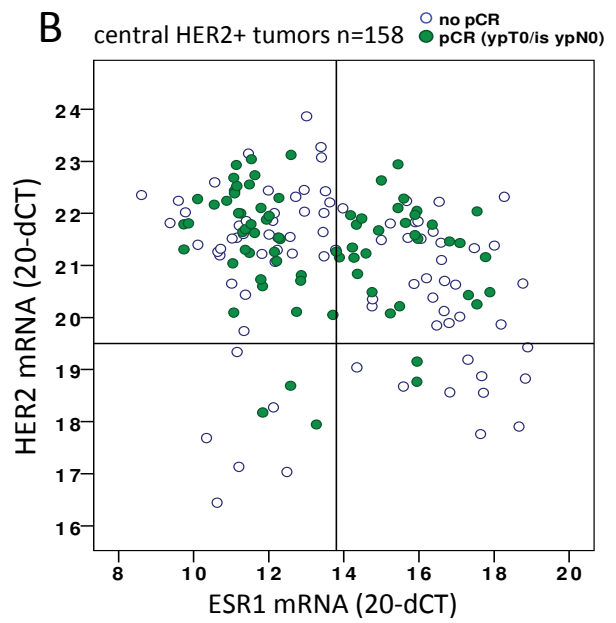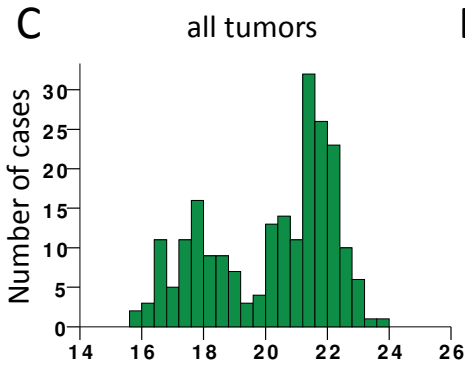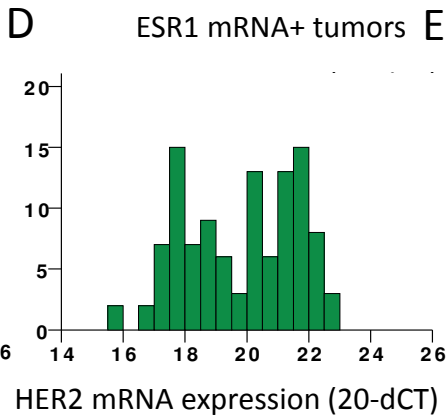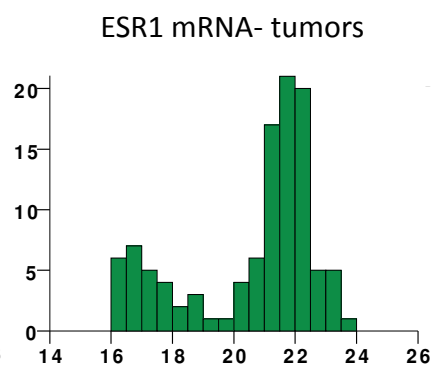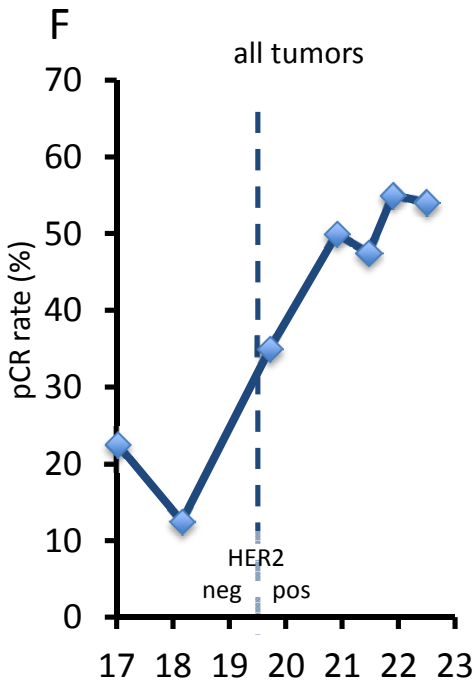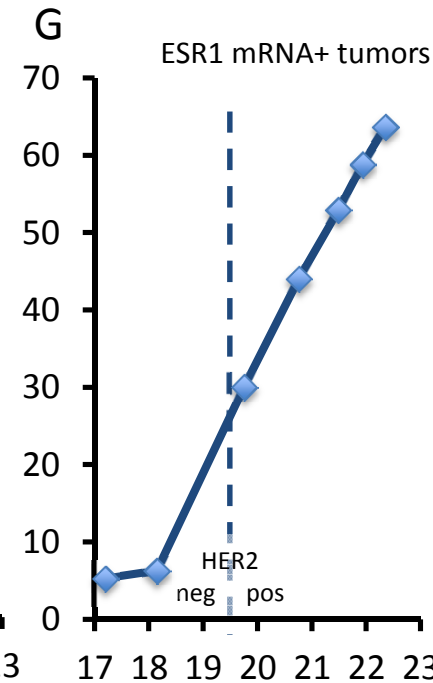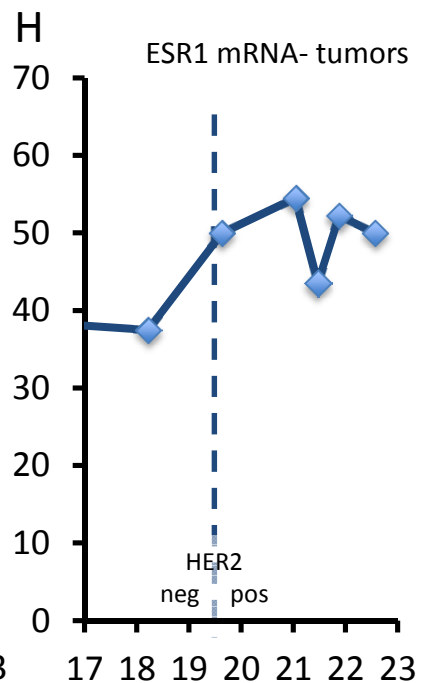

Mean HER2 mRNA expression (20-dCT)

Supplement: MOESM3 [file 9703476]
